# Supplementary material for: Genetically Predicted Circulating Concentrations of Micronutrients and COVID-19 Susceptibility and Severity: A Mendelian Randomization Study
Source: Front Nutr. 2022 Apr 25;9:842315. doi: 10.3389/fnut.2022.842315 (PMC9085481; doi:10.3389/fnut.2022.842315)
Supplement: Supplementary file 1 [file Table_1.XLSX]

## Sheet: Sheet1
		Version 5				Version 6
		Very severe respiratory confirmed covid vs. population		Hospitalized covid vs. not hospitalized covid		Hospitalized covid vs. population		Covid vs. population
Study Name	study_abbrev	cases_a2_v5	controls_a2_v5	cases_b1_v5	controls_b1_v5	cases_b2_v6	controls_b2_v6	cases_c2_v6	controls_c2_v6	Country	Ancestry	IRB	Informed consent	Genotype Platform	QC	Imputation Panel	Ancestry Definition
Amsterdam UMC COVID study group	Amsterdam_UMC_COVID_study_group	66	1413			108	1413	108	1413	The Netherlands	EUR	Amsterdam UMC	Patients or their legal representatives received written information about the study (Amsterdam UMC Covid-19 biobank) and were asked to give written informed consent for participation. If direct informed consent of patients was not feasible, patients could be included with a deferred consent procedure. In case of deferred consent, patients or their legal representatives were informed about the bi…	Infinium Global Screening Array-24 v3.0 array	QC and analysis were carried out according to the COVID-19 hg recommended pipeline and QC parameters as described in the analysis plan version 1.1.	Imputation was conducted with the Michigan Imputation server using the 1000 Genomes phase 3 reference panel.	1) Please provide a more detailed description of the exact procedures used to define the ancestry group included in your analysis, including: - How were principal components calculated ? Which software ? Which markers were included? _x000D_ _x000D_ Before calculating the principal components (PCA), with PLINK, all samples with discordant gender information, elevated missing data rates, outlying h…
AncestryDNA COVID-19 Research Study	Ancestry			250	1967					United States	EUR	Advarra (formerly Quorum)	Yes	Genotype data were generated using an Illumina genotyping array with approximately 730,000 SNPs and processed either with Illumina or with Quest/Athena Diagnostics. _x000D_	To ensure quality of the dataset, each sample passes a number of QC checks, which includes identifying duplicate samples, removing individuals with a per-sample call rate <98%, and identifying discrepancies between reported sex and genetically inferred sex. Array markers with per-variant call rate <98% and array markers that had overall allele frequency differences of >0.10 between any two array …	Individuals were imputed to the Haplotype Reference Consortium reference panel version 1.1, and imputed variants with MINIMAC4 R2 >0.3 and MAF>0.01 were used in GWAS. For each GWAS, a fixed-effects logistic regression model was implemented with PLINK2.0 with either the B1 or C1 phenotype as the outcome and imputed genotype dosage value as the primary predictor. The following were included as fixe…	Description of defining PCs: lines 300-304 in the main text (https://www.medrxiv.org/content/10.1101/2020.10.06.20205864v1.full.pdf)_x000D_ PC plots: Figure 10 in the supplement (https://www.medrxiv.org/content/10.1101/2020.10.06.20205864v1.supplementary-material)
	ANCESTRY_Freeze_Four					1484	113882	25353	113882		EUR
BelCovid	BelCovid	182	1477	361	122	367	1477	488	1477	Belgium	EUR	Hôpital Erasme & University of Liège Academic Hospital Ethics Committees	Our cohort (Belcovid Brussels) was recruited in the early stages of the pandemics (Spring 2020). Given the situation at the time, we worked under an emergency opt-out consent validated by the hospital and the ethics committee.	For cases, genotyping was performed in FIMM. _x000D_ For controls, the genotyping was performed at the University of Liège and genotyped for >700 K SNPs using Illumina’s Human OmniExpress BeadChips, an iScan system and the Genome Studio software following the guidelines of the manufacturer.	Variants were eliminated with call rate ≤0.95, deviating from Hardy–Weinberg equilibrium (p ≤ 10−4), or if monomorphic. European ancestry was confirmed for all individuals by PCA using the HapMap population as reference.	For cases, the analysis was performed in FIMM._x000D_ For controls, the Sanger Imputation Services, with the UK10K + 1000 Genomes Phase 3 Haplotype panels (https://imputation.sanger.ac.uk) using the real genotypes of 629,570 quality-controlled autosomal SNPs as anchors, were used to impute genotypes at autosomal variants in the population. Indels, SNPs with MAF ≤ 0.05, deviating from Hardy-Weinbe…	1. Autosomal markers in 1000 Genomes phase3 panel with MAF > 0.1 intersecting with our data were used. Markers in the Major Histocompatibility Complex (chr6:25Mb-35Mb) and chromosome 8 inversions (chr8:7Mb-13Mb) were removed. PCs were calculated using 1000G as a reference panel and all samples were projected onto the 1000G PCA space. This was all computed using the Hail software._x000D_ 2. A rand…
BioVU	BioVU							141	70615	United States	EUR	Vanderbilt University Medical Center institutional review board	BioVU uses de-identified data and was designated non-human subjects research by the Vanderbilt IRB (IRB#190418). No informed consent was obtained.	Illumina MEGAEX array_x000D_	We used PLINK v1.9 to filter genotypes for SNP(<0.95) and individual (<0.98) call rates, sex discrepancies, and excessive heterozygosity(|Fhet|>0.2). We used principal component analysis as implemented in Eigenstrat to select individuals of European ancestry. We confirmed the absence of genotyping batch effects using ‘batch’ as the phenotype.	We used the Michigan Imputation Server with the reference panel from the Haplotype Reference Consortium. SNPs were filtered for imputation quality (R2 > 0.3 or INFO > 0.95). We restricted to autosomal SNPs with minor allele frequency above 0.01 with allele frequencies. We removed SNPs that differed by more than 10% from the 1000 Genomes Project phase 3 CEU set and those with a Hardy Weinberg Equi…	Run the pre-PCA QC: filter snps with MAF < 0.05, filter snps with HWE p < 1e-3, filters snps with missingness > 2%, filters snps out of the predefined exclusion regions. Regions (for build 37) defined as:1:48000000-52000000,2:86000000-100500000,2:134500000-138000000,2:183000000-190000000,3:47500000-50000000,3:83500000-87000000,3:89000000-97500000,5:44500000-50500000,5:98000000-100500000,5:1290000…
Bonn Study of COVID19 genetics	BoSCO			212	512	212	512			Germany	EUR	Ethics Committee of the Medical Faculty of the University of Bonn._x000D_ Samples recruited at clinical institutions have been enrolled under local ethical approval of the respective institutions.	Yes	GSAv3.0 array (Illumina)	Pre-imputation QC was performed according to the Ricopili pipeline, and in line with the HGI analysis plan. Briefly, SNPs were excluded if call rate (CR) <95%, and samples were removed if CR< 98% and/or gender was inconsistent with the one reported in the phenotype file. We calculated SNP heterozygosity separately for cases and controls, and excluded samples if FHET was larger/smaller than [-0.2,…	We used HRC r.1.1 (2016) which includes 1000 genome v3 and also other cohorts. Imputation was run using the Michigan imputation server.	All principal components were calculated using FlashPCA. The dataset used for the PCA was pruned using Plink1.9 in a pairwise manner using a window size of 1000 kb, a variant count of 50 and a pairwise r2 threshold of 0.2. The PCA for sample exclusion was calculated from genotyped variants before imputation and 260,382 variants were used.The principal components used as covariates in the GWAS wer…
Biobanque Quebec COVID19	BQC19	88	552			378	530	477	431	Canada	EUR	BQC19 received ethical approval from the Jewish General Hospital (JGH) research ethics board (2020-2137) and the Centre hospitalier de l'Université de Montréal (CHUM) research ethics board (19.389).	Yes	Axiom Precision Medicine genotyping array	Marker quality control tests were performed on a subset of ancestrally homogeneous participants genotyped at 861,229 markers, who were determined via comparison to 2,504 individuals across 5 super populations from 1000 Genomes phase 33. We performed batch effect quality control, replicate discordance check, and finally variants with low allele frequency (minor allele frequency (MAF) < 0.001), low…	Imputation was performed using TOPMed reference panel on Michigan server (The NHLBI Trans-Omics for Precision Medicine (TOPMed) Whole Genome Sequencing Program. BRAVO variant browser: University of Michigan and NHLBI. (2018). Available at: https://bravo.sph.umich.edu/freeze5/hg38/. (Accessed: 28th August 2020)).	A subset of participants of European ancestry were determined via comparison to 2,504 individuals across 5 super populations from 1000 Genomes phase 31. These five different ancestries represent individuals of European (EUR), East Asian (EAS), Ad Mixed American (AMR), South Asian (SAS) and African (AFR) ancestry. We first extracted the HapMap 3 SNPs2 (N=1,457,897) and retained markers with the fo…
Colorado Center for Personalized Medicine - CCPM	CCPM							896	24851	United States	EUR	University of Colorado IRB	Yes	Illumina’s Infinium Multi-Ethnic Global Array (MEGA) was used for genotyping. GTC files produced from Illumina’s Autocall and/or Beeline were converted to vcf files using a modified version of Illumina’s GTCtoVCF code (https://github.com/Illumina/GTCtoVCF).	We performed sample QC by plate, checking for sex discordance, excess heterozygosity, high missingness, genetic duplicates, and control sample concordance. We then performed SNP QC checking for high missingness, high differential in allele frequency by sex, high differential in allele frequency by plate, and high discordance across 5 control samples consistent across all plates. In addition, we r…	TOPMed release 2	Here are the QC steps we used to build a combined reference dataset, which we then used to determine ethnic misclassifications. We later ran final PCA after performing all SNP and sample QC_x000D_ To perform tests for ethnic misclassification, we first created a reference database consisting of founders from TGP and the Human Genome Diversity Project (HGDP; https://rosenberglab.stanford.edu/hgdps…
	Coronagenes							181	734		EUR
Columbia University COVID19 Biobank	CU	203	2149			453	2149	508	2149	United States	EUR	Columbia University IRB	We included both, individuals who consented of genetic studies and individuals who we were unable to consent and whose DNA was analyzed under an IRB-approved waiver of consent - The collection of samples to the Columbia University COVID-19 Biobank was approved by the Institutional Review Board (IRB) of Columbia University (IRB protocol number AAAS7370), while the genetic analyses were approved un…	Cases were genotyped using the Illumina Global Diversity Array (GDA) chip_x000D_ Controls were genotyped using the Illumina Multiethnic Global Ancestry (MEGA) chip	The analysis of intensity clusters and genotype calls were performed in Illumina Genome Studio software; all SNPs were called on forward DNA strand and standard quality control (QC) filters were applied, including per-SNP genotyping rate > 95%, per-individual genotyping rate > 90%, minor allele frequency (MAF) > 0.01, and Hardy–Weinberg equilibrium (HWE) test p-value > 10-8 in controls per ancest…	The imputation analysis was performed using TopMed imputation server. A total of 13,439,413 common (MAF>0.01) markers were imputed at high quality (R2 > 0.8) and were used in downstream analyses.	see above
deCODE genetics	DECODE			89	1808	89	274322	4256	270934	Iceland	EUR	The National Bioethics Committee of Iceland	Yes	In total, 166,281 Icelanders have been genotyped with various Illumina SNP chips, long-range phased and imputed based on the sequenced data set. Using genealogic information, genotype probabilities for 282,894 untyped relatives of the genotyped individuals were calculated to further increase the sample size for association analysis and to increase the power to detect associations. (More details i…	Calling software : Graphtyper_x000D_ _x000D_ Per variant call rate > 95%_x000D_ _x000D_ Per sample call rate >97%_x000D_ _x000D_ HWE p-value > 1E-3_x000D_ _x000D_ MAF > 0.1%_x000D_ _x000D_ Genotyping array : Illumina HumanHap300, HumanCNV370, HumanHap610, HumanHap1M, HumanHap660, Omni-1, Omni 2.5 or Omni Express bead chips_x000D_ _x000D_ Chip SNPs were excluded if they produced an excessive inher…	The imputation panel for deCODE genetics study is based on whole genome sequencing of 49,708 Icelanders (Illumina; short reads).	In the COVID-19 analysis of the Icelandic population, we are not using principal components to adjust for population stratification. This is consistent with what we have systematically performed in previous published studies. We had previously (Sveinbjornsson G 2016; 26829749; Price A 2009; 19503599) noted and reported that the first 20 principal components only explain 0.6% of the genotype varia…
	EraCORE							302	1646		EUR
Estonian Biobank	EstBB			60	512	352	196455	4070	189406	Estonia	EUR	Estonian Committee on Bioethics and Human Research	Yes	Illumina GSAv1.0, GSAv2.0, and GSAv2.0_EST arrays. Altogether 155,772 samples were genotyped and PLINK format files were created using Illumina GenomeStudio v2.0.4.	Individuals were excluded from the analysis if their call-rate was < 95% or sex defined based on heterozygosity of X chromosome did not match sex in phenotype data. Variants were filtered by call-rate < 95% and HWE p-value < 1e-4 (autosomal variants only). Variant positions were updated to b37 and all variants were changed to be from TOP strand using tools and reference files provided in https://…	Estonian population specific imputation reference of 2297 WGS samples was used (http://www.nature.com/doifinder/10.1038/ejhg.2017.51).	1) We have used PLINK2 to calculate PCs (--pca 20 approx) and we used 10 first PCs. We used pruned set of variants (--indep-pairwise 100 10 0.1) and only used with MAF>1%._x000D_ 2) We expect that vast majority of Estonian population is monoethnic and therefore no exclusion was made based on ethnicity_x000D_
	EXCEED							236	1083		EUR
FHoGID	FHoGID			362	259	470	280			Switzerland	EUR	Local representatives of Swissethics (CER-VD, CCER, EKOS, EKNZ)	Yes	Infinium Global Screening Array-24 v3.0	We followed recommended QCs using Ricopili pipeline, more precisely:_x000D_ SNP QC: call rate ≥ 0.95_x000D_ Sample QC: call rate in cases or controls ≥ 0.98_x000D_ Sample QC: FHET within +/- 0.20 in cases or controls_x000D_ Sample QC: Sex violations (excluded) - genetic sex does not match pedigree sex_x000D_ SNP QC: call rate ≥ 0.98_x000D_ SNP QC: missing difference ≤ 0.02_x000D_ SNP QC: Hardy-We…	We used HRC r1.1 panel on the Michigan imputation server with Minimap3.	_x000D_ We used pcaer function of the Ricopili pipeline including all markers before imputation._x000D_ We excluded samples with PC1<-0.005 and PC2>0 as described in their website (https://sites.google.com/a/broadinstitute.org/ricopili/pca)._x000D_ We did not use any reference dataset to identify non ancestry-matching samples.
Finngen	FinnGen	68	238643	106	520	273	278193	2695	278193	Finland	FIN	HUS coordinating Ethics Committee	Yes	Illumina Human Core Exome	Illumina Human Core Exome	3,775 Finnish whole genomes	We calculated principal components using PLINK 2 variants included: INFO > 0.95, missingness < 0.01, MAF > 0.05, LD pruning r2 0.1 500kb window_x000D_ - Excluding individuals that did not match the main ancestry group:_x000D_ First PCA on FinnGen+1000 Genomes and a bayesian algorithm to remove_x000D_ outliers. As some Western Europeans were left, then another PCA using_x000D_ FinnGen and projecti…
GCAT. Genomes For Life.	GCAT							447	4541	Spain	EUR	The Germans Trias i Pujol University Hospital Research Ethics Committee (IRB00002131)	Yes	Infinium Expanded Multi-Ethnic Genotyping Array (MEGAEx)	_x000D_ QC of samples: call rate <0.98 (n=61), gender mismatch (n=19), duplicates (n=8), family relatedness up to second degree (n=88), excess or loss of heterozygosity (n=52), non-Caucasian individuals detected as outliers in the PCA plot of the European populations from the 1000 Genomes Project (n=96) and self-reported born outside of Spain (n=147), were filtered out_x000D_ _x000D_ QC of varian…	1000GenomesPhase3_x000D_ HRC_x000D_ GoNL_x000D_ UK10K	We perform ancestry analysis by using information on genotyping data, and self-reported ancestry group and born country. Population structure of the GCAT cohort was assessed by Multidimensional Scaling (MDS) analysis from a subset of SNPs that were common with the 1000Genomes project phase III. Genetic markers from the GCAT MEGAEX SNP array were quality controlled by discarding duplicated probes,…
GEN-COVID, reCOVID	GENCOVID	724	2443	892	249	1287	2443	1697	2443	Italy	EUR	University Hospital of Siena Ethical Review Board	Yes	Illumina Global Screening Array (GSA)	We followed recommended QCs using Ricopili pipeline, more precisely:Sample QC: call rate in cases or controls ≥ 0.98Sample QC: Sex violations (excluded) - genetic sex does not match reported sexSample QC: remove all duplicated samples - IBD > 0.98SNP QC: call rate ≥ 0.98SNP QC: Hardy-Weinberg equilibrium (HWE) in controls p value ≥ 1e-06SNP QC: Hardy-Weinberg equilibrium (HWE) in cases p value ≥ …	Imputation was conducted with TOPMed release 2 https://imputation.biodatacatalyst.nhlbi.nih.gov/	1. Autosomal markers in 1000 Genomes phase3 panel with MAF > 0.1 intersecting with our data were used. Markers in the Major Histocompatibility Complex (chr6:25Mb-35Mb) and chromosome 8 inversions (chr8:7Mb-13Mb) were removed. PCs were calculated using 1000G as a reference panel and all samples were projected onto the 1000G PCA space. This was all computed using the Hail software._x000D_ 2. A rand…
	Generation_Scotland					554	18683	1712	17525		EUR
GenOMICC (Genetics Of Mortality in Critical Care)	genomicc	1676	8380			1676	8380	1676	8380	United Kingdom	EUR	Research Ethics Committees of Scotland, England, Wales, and Northern Ireland	Yes	Illumina Global Screening Array v3.0 + multi-disease beadchips (GSAMD-24v3-0-EA) and Infinium chemistry. The Arrays were imaged on an Illumina iScan platform and genotypes were called automatically using GenomeStudio Analysis software v2.0.3, GSAMD-24v3-0-EA_20034606_A1.bpm manifest and cluster file provided by manufacturer._x000D_	Genotype calls were carefully examined within GenomeStudio using manufacturer and published54 recommendations, after excluding samples with low initial call rate (<90%) and reclustering the data thereafter. Briefly, X and Y markers calls were all visually inspected and curated if necessary, as were those for autosomal markers with minor allele frequency > 1% displaying low Gentrain score, cluster…	TOPMED was used as an imputation panel for the genomicc cohort, while the existing imputation for UK Biobank was used. To avoid bias due to differences in imputation only high quality variants (imputation score > 0.9) in both cohorts were considered.	see above
UK 100,000 Genomes Project	genomicsengland100kgp							822	44369	United Kingdom	EUR	East of England – Cambridge Central REC	Yes	All samples were sequenced with 150bp paired-end reads using Illumina HiSeq X and uniformly processed on the Illumina North Star Version 4 Whole Genome Sequencing Workflow (NSV4, version 2.6.53.23); which comprises the iSAAC Aligner (version 03.16.02.19) and Starling Small Variant Caller (version 2.4.7). Samples were aligned to the Homo Sapiens NCBI GRCh38 assembly with decoys. Single-sample gVCF…	Sample QC: Samples with contamination>0.03 (estimated using verifyBamID), excess of chimeric reads>5%, median fragment size<250bp, percentage of AT dropout>10%, percentage of mapped reads<60% were excluded from the analysis._x000D_ _x000D_ Variant QC: Only variants with a minor allele frequency (MAF)>=0.5% were assessed. Variants are further filtered for a median coverage≥10, median GQ≥20, and a …	No imputation panel was used. The analyses were conducted using Whole Genome Sequencing data.	Genomics England (genomicsengland100kgp study) method details for ancestry prediction (HGI-covid freezes 1-3). PCA for ancestry prediction We calculated principal components (PCs) and SNP loadings for 1KGP3 by using GCTA v.1.93.1_beta on a 30K set of high-quality independent variants (see separate section on marker selection). We then used the 1KGP3 SNP loadings to calculate projected individual …
Genotek COVID-19 study	Genotek							676	12317	Russia	EUR	Ethical review board in Genotek Ltd.	Yes	Illumina Infinium Global Screening Array v1 / v2 / v3	QC steps_x000D_ 1) Individual call rate > 98%_x000D_ 2) SNP call rate > 98%_x000D_ 3) genetic sex vs reported sex_x000D_ 4) heterozygosity (>3sd)_x000D_ 5) HWE filtering_x000D_ 6) relative filtering_x000D_ 7) PCA outliers	HRC + 1000 Genomes	We used the following 2-step procedure for the outlier detection and covariate calculations._x000D_ _x000D_ Step 1 (detection of outliers)_x000D_ 1. Merge our data (after QC filtering) with 1KG;_x000D_ 2. Prune the data and run MDS analysis;_x000D_ 3. Use the first 2 components to plot the data with the external populations and run clustering (DBSCAN algorithm)._x000D_ Parameters for DBSCAN are s…
Genes for Good	GFG							136	4978	United States	EUR	University of Michigan Health Sciences and Behavioral Sciences IRB	Yes	Illumina Infinium CoreExome-24 v.1.0 or v.1.1	Genotype Variant Filtering PASS:_x000D_ HWE p-value > 0.0001 among unrelated European samples_x000D_ Call rate > 0.99_x000D_ _x000D_ Genotypes Sample Filtering PASS:_x000D_ Call rate > 0.99_x000D_ Contamination coefficient < 5.0_x000D_ _x000D_ Genotype Sample Exclusions:_x000D_ Large chromosomal copy number variants (single chromosome with missingness >= five times larger than other chromosomes)_…	TOPMed R2 panel	- Principal components were calculated with plink-1.9 with the --pca option. All directly genotyped markers were used as input._x000D_ - Individuals in the Genes for Good study are predominantly of European ancestry. No specific exclusion was applied.
MyCode Health Initiative	GHS_Freeze_145	53	112862			773	108168	5276	108168	United States	EUR	Geisinger IRB	Yes	Illumina’s Omni (~60K) or Global Screening Array (~85K)	All array-based data are QC’ed with standard quality control procedures before imputation and association testing (i.e. exclude sex mismatch, sample (90%) and variant call rate (99%), remove duplicate samples, Hardy-Weinberg P<1e-15, heterogeneity F>0.4)( PMID: 21234875).	TOPMed Freeze 5 reference panel using the Michigan Imputation Server	Ancestry estimation was performed using whole exome sequences (WES) from the full MyCode sample population. We first extracted the overlapping SNPs between HapMap3 global populations and the WES. This list was filtered on minor allele frequencies (MAF) > 5%, genotyping call rate of 90%, and single nucleotide polymorphisms (SNPs) only (i.e. insertions and deletions were removed). Principal compone…
Helix Exome+ COVID-19 Phenotypes	Helix							178	5441	United States	EUR	The Helix DNA Discovery Project study: Western IRB _x000D_ The HNP study: University of Nevada, Reno IRB	Yes	Exome+ assay includes sequencing of common variants	Data were processed using a custom version of Sentieon and aligned to GRCh38, with variant calling and phasing algorithms following GATK best practices. Imputation of common variants was performed by pre-phasing samples and then imputing. Pre-phasing was performed using reference databases, which include the 1000 Genomes Phase 3 data. This was followed by genotype imputation for all 1000 Genomes …	1kg	Ancestry was determined using 10,000 ancestry informative markers covered in our Exome+ sequencing assay and comparing to Phase 3 data of the 1000 Genomes project using the program Admixture (https://www.genetics.ucla.edu/software/admixture/, version 1.3.0) with the supervised mode, based on 5 continental populations. Individuals were assigned as European ancestry if their European admixture was …
COVID19-Host(a)ge	HOSTAGE					3151	12483	3151	12483	Germany	EUR	The following approvals of the project were obtained from the relevant ethics committees: _x000D_ Germany: Kiel _x000D_ Italy: Fondazione IRCCS Cá Granda Ospedale Maggiore Policlinico, Humanitas Clinical and Research Center, IRCCS, UNIMIB School of Medicine, San Gerardo Hospital, Monza, the Ethics Committee of the National Institute of Infectious Diseases Lazzarro Spallanzani _x000D_ Norway: Regi…	Yes	Illumina’s Global Screening Array (GSA) version 2.0. Initial genotype calling extracting GSA genotyped data from intensity data files was performed with the Illumina GenomeStudio v. 2.0 software with the cluster definition file GSAMD24v2-0_20024620_A1-762Samples-LifeBrain. (https://www.illumina.com/documents/products/datasheets/datasheet_genomestudio_software.pdf. Finally, we had 712,189 SNPs bef…	Based on initial genotype data, we removed samples with <90% callrate using PLINK. After genotype calling a unified QC procedure was carried out for the Spanish and Italian case-controls GWAS data sets. Variants that had >2% missing data, minor allele frequency (MAF) <0.1% in either of the different disease sets or in controls, different missing genotype rates in affected and unaffected individua…	Imputation was done on genome build GRCh38 using the Michigan Imputation Server and 194,512 haplotypes generated by the Trans-Omics for Precision Medicine (TOPMed) program (Freeze 5).	- To identify ancestry outliers and to test for population stratification within and across batches (merged for the Italian and Spanish panels), we performed principal component analysis (PCA) for QCed cases and controls using the PCA method as implemented in FlashPCA2 PubMedID 28475694, using a LD-pruned subset of SNPs on the basis of a set of independent (MAF>5%) SNPs excluding X- and Y-chromos…
	HUNT							283	52072		EUR
idipaz24genetics	idipaz24genetics	59	75			106	75	106	75	Spain	EUR	Committee for Human Subjects of La Paz University Hospital (Madrid, Spain)	Yes	Infinium Global Screening Array-24 v3.0 BeadChip	Sample QC: call rate in cases or controls ≥ 0.98_x000D_ Sample QC: FHET within +/- 0.20 in cases or controls_x000D_ Sample QC: Sex violations (excluded) - genetic sex does not match pedigree sex_x000D_ SNP QC: call rate ≥ 0.98_x000D_ SNP QC: missing difference ≤ 0.02_x000D_ SNP QC: Hardy-Weinberg equilibrium (HWE) in controls p value ≥ 1e-06 (i.e., ≥ log 10(p) of -6)_x000D_ SNP QC: Hardy-Weinberg…	TOPMED imputation panel	How were principal components calculated? Which software? Which markers were included?_x000D_ We used a combination of different tools through K36 Eurogenes, Global25, and ADMIXTURE software_x000D_ _x000D_ How did you exclude individuals that did not match the leading ancestry group?_x000D_ All samples were used, none excluded. _x000D_ _x000D_ Did you use any reference dataset to identify non-anc…
	INMUNGEN_CoV2					236	654	236	654		EUR
UK Blood Donors Cohort	INTERVAL							2098	39733	United Kingdom	EUR	The National Research Ethics Service	Yes	The UK Biobank Affymetrix Axiom genotyping array	Basic sample QC included removal of duplicate samples, clearly non-European ancestry samples, heterozygosity outliers, high contamination samples, sex mismatches, missing sex information etc. Basic variant QC included removal of batch-specific variant outliers, strong deviators from HWE, low within-batch call-rate, allele frequency deviations across batches etc. Further details can be found in As…	A combined 1000Genomes Phase3 - UK10K reference imputation panel.	1) PCA_x000D_ - flashpca v.1.2.5. Here is quote from the following reference, _x000D_ _x000D_ Astle, W. J., et al. (2016). "The Allelic Landscape of Human Blood Cell Trait Variation and Links to Common Complex Disease." Cell 167(5): 1415-1429 e1419._x000D_ _x000D_ … a robust set of variants were derived using the same methods as UK Biobank, i.e., selecting autosomal variants … that had passed var…
	Italy_HOSTAGE	698	1255								EUR
Latvia COVID-19 research platform	LGDB					57	1531	275	1313	Latvia	EUR	Central Medical Ethics Committee of Latvia	Yes	GSA chip (Infinum Global Screening array, Illumina)	We performed all QC steps recommended by "COVID-19 Host Genetics Analysis Plan v1.1", as well as filtering maf > 0.01.	TOPMed r2	- How were principal components calculated ? Which software ? Which markers were included?_x000D_ _x000D_ We included LD independent markers with R2 < 0.2 (~70k). Both pruning and PC calculation performed with PLINK 1.9 software._x000D_ - How did you exclude individuals that did not match the main ancestry group ?_x000D_ _x000D_ We exclude individuals with deviation of six sigma (six standartd de…
Lifelines	Lifelines							895	26600	The Netherlands	EUR	IRB of University Medical Centre Groningen	Yes	Illumina Global Screening Array and HumanCytoSNP genotype platform	The first subset of samples were genotyped with two different versions of HumanCytoSNP (12v2.0 and 12v2.1). The versions were harmonized and unified by using only probes that were present in both platforms, mapping to the same genome build (37), and making sure that resulting location was concordant with either 1000 Genomes phase 3 or Genome of the Netherlands (GoNL) data. Following this, the gen…	HRC	Genotyping was done on two platforms over time, namely HumanCytoSNP and Infinium Global Screening Array® (GSA). The datasets obtained from these platforms are named CytoSNP and UGLI respectively. For each dataset, ancestries were defined using principal component analyses (PCA). Below is described how this is done for each of the two datasets. CytoSNP: After a comprehensive QC based on call rate …
Michigan Genomics Initiative	MGI							122	51458	United States	EUR	University of Michigan IRB	Yes	Illumina Infinium CoreExome	Sample-level QC was performed on a rolling basis as batches of samples were genotyped. This approach allowed prompt response and issue remediation if needed. A sample was flagged per batch and excluded from the Data Freeze if any of the following issues were raised during sample QC: (1) patient had withdrawn from the study, (2) genotype-inferred sex did not match the self-reported gender of the p…	TopMed	The majority ancestry of MGI participants corresponding to each sample was first inferred by performing principal component analysis using PLINK (v1.9)9. Principal component calculations were based off a reference genotype panel of Human Genome Diversity Project (HGDP) samples10. MGI samples were projected onto the space created by the first two principal components of the HGDP samples. MGI sampl…
	MOBA							391	56038		EUR
Mount Sinai Health System COVID-19 Genomics Initiative	MSHS_CGI									United States	EUR	Mount Sinai Program for the Protection of Human Subjects	Yes	Global Diversity Array (GDA-8v1-0_A1) or the Global Screening Array (GSA-24v1-0_A1)	12 Related individuals were found using identity by descent, and subsequently removed. Likewise, 18 samples failing sexcheck were also excluded. SNPs and individuals were then filtered using Ricopilli, according to convention provided by HGI. 312324 SNPs and 1726 individuals (Ncases=330, Ncontrols=1396) and passed QC.	TOPMED
VA Million Veteran Program	MVP			436	1083	2417	366449	11778	357198	USA	EUR	VA Central IRB	Yes	Customized Affymetrix Axiom biobank array, the MVP 1.0 Genotyping Array, containing 723,305 variants.	Variants that were poorly called (genotype missingness > 5%) or that deviated from their expected allele frequency based on reference data from the 1000 Genomes Project were excluded. Samples were excluded that had a call rate > 98.5%	1000Genomes version 3 phase 5	see above
Netherlands Twin Register	NTR							228	5265	The Netherlands	EUR	Local Ethics & Science committee FGB, Vrije Universiteit Amsterdam	Yes	Genotyping was done on multiple platforms over time, namely Perlegen-Affymetrix, Affymetrix 6.0, Affymetrix Axiom, Illumina Human Quad Bead 660, Illumina Omni 1M and Illumina GSA. _x000D_	For each genotype platform, samples were removed if DNA sex did not match the expected phenotype, if the PLINK heterozygosity F statistic was < -0.10 or > 0.10, or if the genotyping call rate was < 0.90. SNPs were removed if the minor allele frequency (MAF) < 1×10-6, if the Hardy-Weinberg Equilibrium (HWE) p-value < 1×10-6, and/or if call rate < 0.95. Subsequently, for each platform, the genotype…	Per platform the data was phased using Eagle and then imputed to 1000 Genomes and Topmed using Minimac.	Note that the NTR uses 6 different genotype platforms, for each platform the analysis was done separately in order to exclude population outliers. Markers were selected if: MAF > 0.05, Call rate >= 98%, HWE p>10-6. The remaining markers were LD pruned using the standard PLINK –indep 50 5 2 option. Then, SNPs from the below given long-range LD regions in the genome were also excluded, to avoid spe…
Mass General Brigham - Host Vulnerability to COVID-19	PHBB									United States	EUR	Mass General Brigham IRB	Yes	Illumina Multi-Ethnic Genotyping Array, which covers more than 1.7 million markers, and is enriched for exome content with >400,000 markers missense, nonsense, indels, and synonymous variants.	All genotyped datasets separately underwent the same 3-step quality control protocol using PLINK25, including 2 stages of SNP removal and an intermediate stage of sample exclusion. The exclusion criteria for genetic markers consisted on i) proportion of missingness ≥ 0.05, ii) Hardy-Weinberg Equilibrium p-value (p) ≤ 1x10-6 for controls and Hardy-Weinberg Equilibrium p ≤ 1x10-20 for all the cohor…	TOPMed R2. We performed a two-stage imputation procedure, which consisted in pre-phasing the genotypes into whole chromosome haplotypes followed by imputation itself. The pre-phasing was performed using SHAPEIT2, and then imputed using the TOPMED R2 reference panel using the TOPMed imputation server. For chrX, we restricted the analysis to non-pseudoautosomal (non-PAR) regions. We stratified the …	see above
	PMBB							60	9702		EUR
	SINAI_COVID							942	3784		EUR
	Spain_HOSTAGE	302	925								EUR
Determining the Molecular Pathways and Genetic Predisposition of the Acute Inflammatory Process Caused by SARS-CoV-2	SPGRX	101	302	311	51	311	302	362	302	Spain	EUR	The Comité de Etica Provincial de Granada and the Comité de ética de la Investigación con Medicamentos Area de Salud Valladolid	Yes	Genotyping array: Infinium Global Screening Array-24 v3.0 Kit	Basic QC step: _x000D_ Sample QC: call rate in cases or controls ≥ 0.98 _x000D_ Sample QC: FHET within +/- 0.20 in cases or controls _x000D_ Sample QC: Sex violations (excluded) - genetic sex does not match informed sex _x000D_ Sample QC: Kinship Coefficient Threshold 0.055. _x000D_ Sample QC: European ancestry was tested (by PCA computed with a set of Ancestry Informative Markers). _x000D_ SNP Q…	1000Genomes	A set of 2512 Ancestry Informative Markers for 1000Genomes Word Populations (1KGWORLD.SPGRX.AIMs.list, Grch37) was used for computing principal components (PCs) with Plink2 (--pca). The PCs calculated with these AIMs were able to assign the 1000Genomes samples to their world populations (AFR, AMR, ASN y EUR). PCs for the study sample were calculated with these AIMs. From these PCs, the mean of th…
Genomic epidemiology of SARS-Cov-2 and host genetics in Coronavirus Disease 2019 (COVID-19)	Stanford							169	190	United States	EUR	Stanford University IRB, Panel #8	Consent waiver for initial data collection but consent for survey data. The study was approved by IRB with the waiver for collection of medical record and other non survey data - all participants gave written informed consent before being enrolled [in the study]. If collected data based on the consent waiver, the study was approved by the institutional review board of Stanford University. The use…	We used low-pass sequencing, with data generated on an Illumina NovaSeq 6000 using an S4 300 cycle flow cell._x000D_ _x000D_	Low-coverage FASTQ sequences underwent quality control assessment via FastQC v0.11.8 before alt-aware alignment to GRCh38.p12 using BWA-MEM v0.7.17-r1188. Duplicate sequences were marked with MarkDuplicates of the Picard Tools suite v2.21.2. After duplicate marking, base quality score recalibration was performed with Picard Tools’ BaseRecalibrator and high-confidence variant call sets from dbSNP …	To account for the low-coverage sequencing we used the GLIMPSE algorithm v1.0 for imputation using the 1000 genomes project samples as a reference. The imputed data were filtered for low imputation scores (INFO>0.8), and were then merged with a reference set that contained samples from: (1) the 1000 genomes project, (2) the HGDP, and (3) the SGDP. While merging these data we set minor allele coun…	BAM files were used for an initial calling with bcftools v1.9 mpileup. To account for our low-coverage sequencing we used the GLIMPSE algorithm v1.0 for imputation. For PCA, the imputed data were filtered for low imputation scores (INFO>0.8), and were then merged with a reference set that contained samples from: (1) the 1000 genomes project, (2) the HGDP, and (3) the SGDP. While merging these dat…
The genetic predisposition to severe COVID-19	SweCovid	77	3748			113	3748	113	3748	Sweden	EUR	Etikprövningsmyndigheten (Swedish Ethical Review Authority)	Yes	Illumina GSA MD (genotyping and QC performed by FIMM)		TopMed	1. Autosomal markers in 1000 Genomes phase3 panel with MAF > 0.1 intersecting with our data were used. Markers in the Major Histocompatibility Complex (chr6:25Mb-35Mb) and chromosome 8 inversions (chr8:7Mb-13Mb) were removed. PCs were calculated using 1000G as a reference panel and all samples were projected onto the 1000G PCA space. This was all computed using the Hail software._x000D_ 2. A rand…
CHRIS	TOPMed_CHRIS10K							92	2373	Italy	EUR	Ethical Committee of the Healthcare System of the Autonomous Province of Bolzano	Yes	Illumina OmniExpressExome	for QC we followed the analysis protocol	TOPMed	For both studies we calculated 10 PCAs using plink1.9 focusing on chromosome 2 and after pruning the data using these plink commands: "--indep-pairwise 50 10 0.1 --maf”._x000D_ As reference data set, we used 1000 Genomes Phase 3 and then excluded all individuals that did not cluster with Europeans.
Val Gardena	TOPMed_Gardena							452	458	Italy	EUR	Ethical Committee of the Healthcare System of the Autonomous Province of Bolzano	Yes	Illumina GSA	QC followed the HGI analysis plan	TOPMed	For both studies we calculated 10 PCAs using plink1.9 focusing on chromosome 2 and after pruning the data using these plink commands: "--indep-pairwise 50 10 0.1 --maf”._x000D_ As reference data set, we used 1000 Genomes Phase 3 and then excluded all individuals that did not cluster with Europeans.
	TwinsUK							247	2320		EUR
UCLA Precision Health COVID-19 Biobank	UCLA			80	123					United States	EUR	UCLA IRB	Yes	GSA 650k array	standard GWAS QC (HWE, missigness, outlier removal)	TopMed Freeze5 using Michigan imputation server.	see above
UK Biobank	UKBB	309	328577	1670	4610	3067	417464	13256	407275	United Kingdom	EUR	Northwest Multi-Centre Research Ethics Committee for the UKB	Yes	UK Biobank study protocol and details in genotype QC is available online(ref below)._x000D_ _x000D_ _x000D_ _x000D_ Bycroft C, Freeman C, Petkova D, et al. The UK Biobank resource with deep phenotyping and genomic data. Nature 2018; 562: 203–9._x000D_ Genotyping and quality control of UK Biobank, a large-scale, extensively phenotyped prospective resource. https://biobank.ctsu.ox.ac.uk/crystal/cry…	UK Biobank study protocol and details in genotype QC is available online:_x000D_ _x000D_ _x000D_ _x000D_ Bycroft C, Freeman C, Petkova D, et al. The UK Biobank resource with deep phenotyping and genomic data. Nature 2018; 562: 203–9._x000D_ Genotyping and quality control of UK Biobank, a large-scale, extensively phenotyped prospective resource. https://biobank.ctsu.ox.ac.uk/crystal/crystal/docs/g…	HRC	see above
	Vanda					58	900	58	900		EUR
	WGHS							225	11887		EUR
